# Supplementary material for: Simulations for charge transfer and photocurrent calculations using hematite for green hydrogen production
Source: Royal Society of Chemistry journal article supplement (doi:10.1039/d3ya00366c), 2023-12-27
Supplement: d3ya00366c1.pdf [file d3ya00366c1.pdf]

# Supporting Information

## Total Energies of Electrons

Table S1 - total energies of the simulation for electrons, by slab and by dopant.

| Dopant  | *OH <sub>2</sub> Slab (eV) | *OH Slab (eV) | *O Slab (eV) | *OOH Slab (eV) |
|---------|----------------------------|---------------|--------------|----------------|
| Undoped | 2.0804                     | 1.7528        | -0.1106      | 1.5475         |
| Al      | 2.3136                     | 1.9174        | -0.0797      | 1.8025         |
| Ni      | 2.1156                     | 0.5982        | -0.6691      | 0.8126         |
| Ti      | 2.0820                     | 1.8885        | -0.7439      | 0.9158         |

## Cumulative Probability With the Same Kinetic Energy for All Intermediates

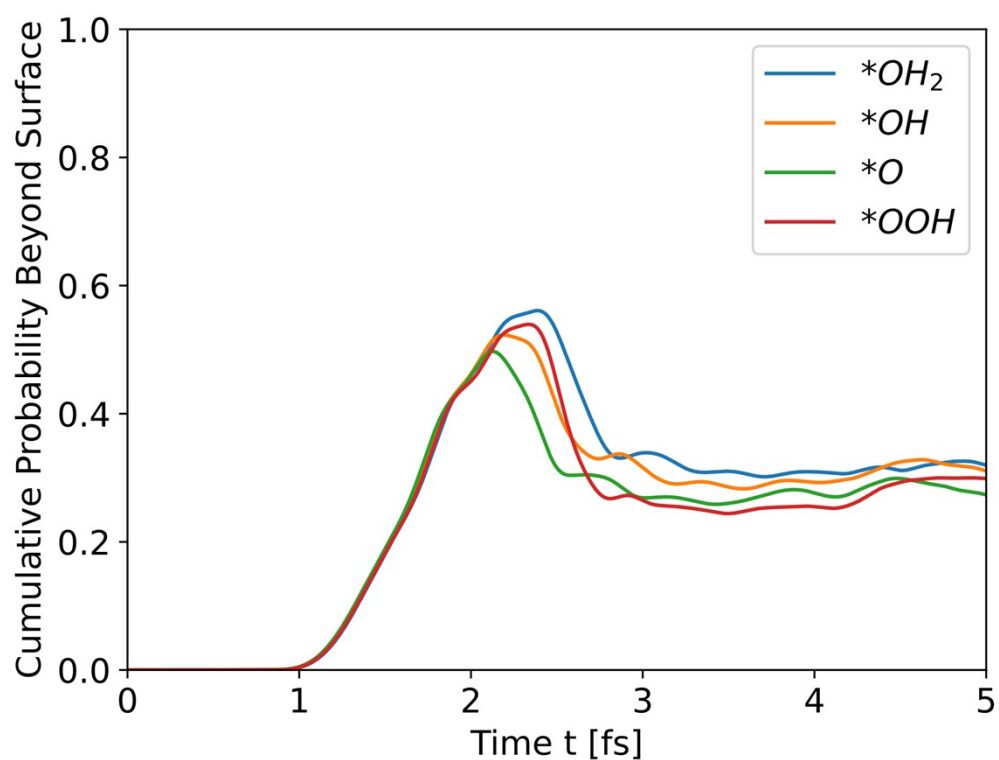

Figure S1 - cumulative probability beyond the surface for all intermediates with the same starting kinetic energy.

## Cumulative Probability Beyond the Surface – Other Dopants

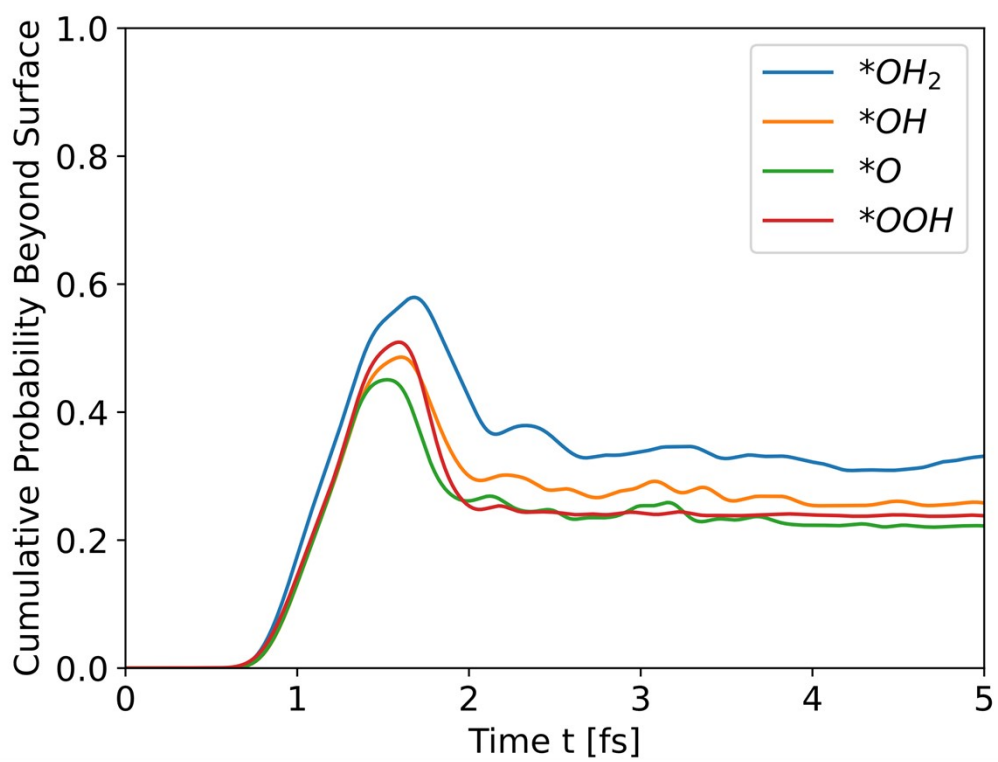

Figure S2 - cumulative probability beyond the surface, Al doped hematite. Hole propagation.

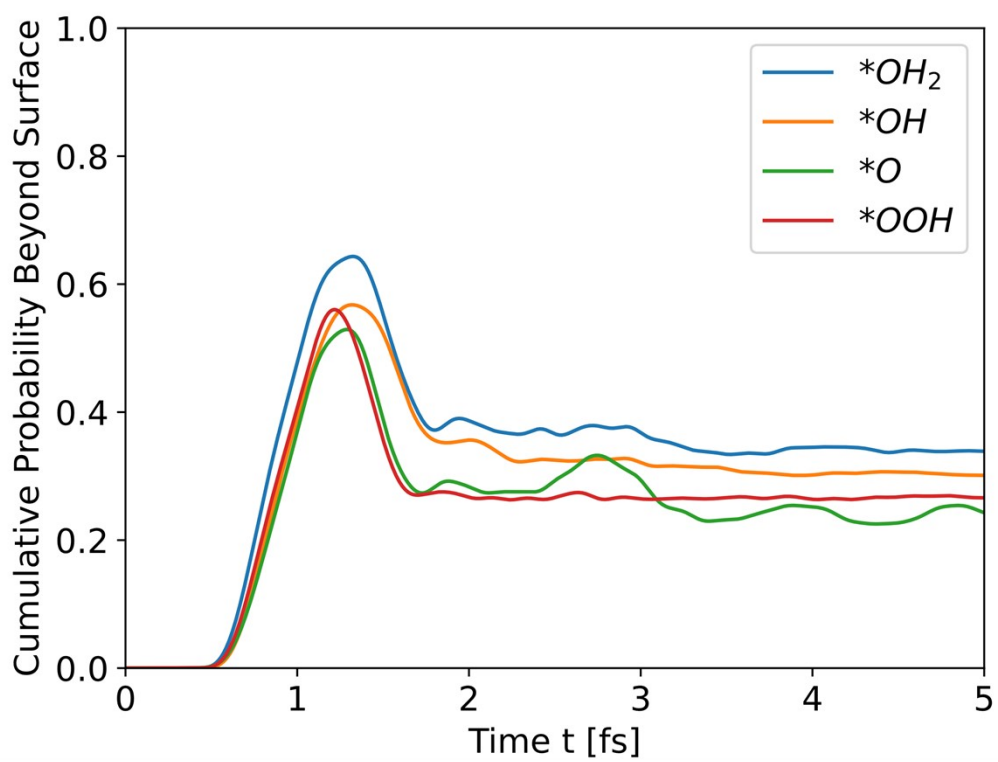

Figure S3 - cumulative probability beyond the surface, Ti doped hematite. Hole propagation.

## INCAR File for LOCPOT Generation

```
SYSTEM= feouj0          # title of the task

# Dimensions of arrays

EMIN =  -20             #minimum energy for evaluation of DOS
EMAX =  20              #maximum energy for evaluation of
DOS
NEDOS=  20000          #number of grid points in DOS

# Start parameter for this run:

ISTART = 1             # job    : 0-new  1-cont  2-samecut #
changed from 1
ICHARG = 1             # charge: 1-file 2-atom 10-const
#INIWAV = 1           # electr: 0-lowe 1-rand  2-diag
PREC = Accurate        # medium, high low
ALGO = Very_Fast       #Normal,VeryFast...#specify the
electronic minimisation algorithm
#TIME= 0.4             #controls the trial time step for
IALGO=5X, for the initial (steepest descent) phase of
IALGO=4X

# DOS related values:

ISMEAR = -5           #-5,-4,-3,-2,0,N #0-Gaussian
smearing

                                #determines how the partial
occupancies f(n,k)are set for each orbital
SIGMA = 0             #broadening in eV -4-tet -1-fermi 0-
gaus
EDIFF=1E-4            #global break condition for the
electronic SC-loop
NELM=1500              #maximum number of electronic SC
(selfconsistency) steps
NELMIN = 6
```

```

LWAVE=.TRUE.          #These tags determine whether the
orbitals (file WAVECAR),

LCHARG=.TRUE.        #the charge densities (file CHGCAR
and CHG) are written

LVTOT=.TRUE.        # Write LOCPOT

# Spin and symmetry parameters

MAGMOM= 19*0 6*4.2 6*-4.2 4*0 #Specifies the initial
magnetic moment for each atom (order of POSCAR)

ISPIN=2              #1=non/2= spin polarized calculations
are performed

ISYM=0               #-1,0,1,2,3 #switch symmetry on
(ISYM=1, 2 or 3) or off (ISYM=-1 or 0)

LMAXMIX=4            #controls up to which l quantum
number the onsite PAW charge densities are passed through
the charge density mixer and written to the CHGCAR file

# Ionic relaxation

EDIFFG = -3.0E-2     #Def=EDIFF*10 defines the break
condition for the ionic relaxation loop

LORBIT=10            #11=>RWIGS in INCAR is not read.
DOSCAR and lm decomposed PROCAR file

NSW = 2000           #maximum number of ionic steps

IBRION = 2           #=-1 for NSW=0 or NSW=1 #determines
how the ions are updated and moved

#IOPT = 7

POTIM = 0.25         #For IBRION=1,2 or 3, POTIM serves as
a scaling constant for the forces

ISIF=0               #0-6 =0 if IBRION=0(MD)else =2
#controls whether the stress tensor is calculated

#ADDGRID = .TRUE.

LREAL=.False.        #projection done in:
FALSE=reciprocal/TRUE=real space

#LREAL = Auto        # Speed things up

#NSIM=1              #if spacificed the RMM-DIIS
algorithm(IALGO=48)works in a blocked mode

```

```
NPAR=4          #~sqrt(number of cores) or number of
cores per compute node

KPAR=4          #KPAR is the number of k-points that
are to be treated in parallel

#NBAND          #Def: NELECT/2 + NIONS/2 (non-
spinpolarized)
                #      0.6*NELECT + NMAG (spin-
polarized)
                #determines the actual number of
bands in the calculation

ENCUT = 700 eV  #Cut-off energy for plane wave basis
set in eV. largest ENMAX from POTCAR-fil

#On site Coulomb interaction: L(S)DA+U
LDAU=.TRUE.     #TRUE-switches on the L(S)DA+U
LDAUTYPE= 2     #specifies which type of L(S)DA+U
approach will be used
LDAUPRINT= 0    #0,1,2. controls what to write in
OUTCAR
LDAUL= -1 2 -1 -1  #-1=no on-site terms added, 1= p,
2= d, 3= f
LDAUU= 0.0 4.6 0.0 #specifies the effective on-site
Coulomb interaction parameters
LDAUJ= 0.0 0.3 0.0 #specifies the effective on-site
Exchange interaction parameters
```

# Wave Propagation Code

```
# Read LOCPOT

import numpy as np
import re
import scipy.signal as sig
import scipy.interpolate as sint

def extendPotential(potential, zaxis, numpoints):
    firstPoint = np.repeat(potential[0], numpoints)
    lastPoint = np.repeat(potential[-1], numpoints)
    dz = zaxis[1]-zaxis[0]
    newPot = np.concatenate((firstPoint, potential, lastPoint))
    zAdd = np.linspace(dz, 2*numpoints*dz, 2*numpoints)
    newZ = np.concatenate((zaxis, zaxis[-1]+zAdd))
    return newPot, newZ

def extendInternalPotential(potential, zaxis, numtimes):

    # Take the repeating unit of the potential and insert
    multiple times

    # Find peaks of minus potential (find minimas)
    inds, props = sig.find_peaks(-potential, width=10)

    # The repeating potential
    exPot = potential[inds[1]:inds[-2]]
    dz = zaxis[1]-zaxis[0]
    newPot =
np.concatenate((potential[:inds[1]], np.tile(exPot, numtimes), poten
tial[inds[1]:]))
    newZ = np.arange(0, len(newPot)*dz-1e-9, dz)
    return newPot, newZ

def addVoltage(potential, zaxis, voltage):
    EField = voltage / (zaxis[-1]-zaxis[0])
    newPot = potential - EField * (zaxis - zaxis[0])
    return newPot

def ReadLOCPOT(FilePath, internalDups, vacuumEx, voltage):

    # Open file and read contents
    fid = open(FilePath, 'r')
    fconts = fid.read()

    # Define regex to find dimensions
    findtext = ('\s* \d+ \s* \d+ \s* \d+')

    # Find all occurrences of three integers in a line
    x = re.findall(findtext, fconts)

    # Take the last occurrence and split into components
    xdim, ydim, zdim = x[-1].split()
    dimen = int(zdim), int(xdim), int(ydim)
    zpoints = dimen[0]

    # Now find the line where the potential begins
    newtext = '(.)' + xdim + '(.)' + ydim + '(.)' + zdim +
'(.*)'
```



```

# Delete file contents (to save memory)
fconts = None

# Rewind to beginning of file
fid.seek(0)

# Read entire file into a list by line
linelist = fid.readlines()
fid.close()

# Get length of z vector
# IMPORTANT: assumes cubic, tetragonal,
# or hexagonal lattice
zlength = float(linelist[4].split()[-1])

# Create k-vector
# Divide into dz - entire length by number of points
dz = zlength / zpoints
zaxis = (np.arange(zpoints)-1)*zlength/zpoints

# Look for beginning of potential
LineToStart = 0
for i in linelist:
    LineToStart = LineToStart + 1
    if re.match(newtext,i):
        break

# Initialize potential variable
potential = np.zeros(np.prod(dimen))

# How many lines to read (assuming 5 points
# per line with overflow)
LinesToRead = int(np.ceil(np.prod(dimen)/5))

# Read potential into array
k = 0
for i in linelist[LineToStart:LineToStart+LinesToRead]:
    LineRead = i.split()
    for j in LineRead:
        potential[k] = float(j)
        k = k + 1

# Reshape - z-axis FIRST (first index is sheets)
potential = np.reshape(potential,dimen)

# Average over xy axis
avpot = np.sum(potential,axis=(1,2))/np.prod(dimen[1:])
if (len(avpot) % 2 == 0):
    avpot = np.append(avpot,avpot[-1])
    zaxis = np.append(zaxis,zaxis[-1]+dz)

"""
gridSize = int(np.round(len(zaxis)*np.round(dz/0.001+5,-1),-
3))
intPot = sint.interp1d(zaxis,avpot)
zaxis = np.linspace(zaxis[0],zaxis[-1],gridSize)
avpot = intPot(zaxis)
"""
# How many times to replicate the bulk

```

```

    avpot, zaxis =
extendInternalPotential(avpot,zaxis,internalDups)

    # How many points to add to each side of the potential
    avpot, zaxis = extendPotential(avpot,zaxis,vacuumEx)

    # Increase number of points
    zpoints = len(zaxis)

    EField = voltage / zaxis[-1]
    avpot = avpot - EField * zaxis
    # Return correct k-axis
    kaxis = np.fft.fftfreq(zpoints,dz)*2*np.pi

    return avpot, zaxis, kaxis

# All functions for ChargeProp

import numpy as np
from sympy.solvers import solve
from sympy import Symbol
from scipy.special import erf

# h-bar in eV * fs
hbarev = 6.58211951e-16 * 1e15

# h-bar in kg A^2 / fs
hbar = 1.0545718e-34 * 1e-15 * 1e20

# h-bar in J s
# Gives energy in J, k in 1/m
hbark = 1.0545718e-34

# electron mass in kg
me = 9.10938356e-31

# electron charge in C
q = 1.602176634e-19

def RunOneTimestep(wavefun, timestep, V, K):
    TempWavefun = np.exp(-1j*V*timestep/(2*hbarev))*wavefun
    TempWavefun = np.fft.fft(TempWavefun)
    TempWavefun = np.exp(-
1j*hbar*timestep*K**2/(2*me))*TempWavefun
    TempWavefun = np.fft.ifft(TempWavefun)
    TempWavefun = np.exp(-1j*V*timestep/(2*hbarev))*TempWavefun
    return TempWavefun

def calculateProbabilityCurrent(wavefun, k):
    dwavefun = deriveOne(wavefun, k)
    cwavefun = np.conj(wavefun)
    cdwavefun = np.conj(dwavefun)
    j = hbar/(2*me*1j) * (cwavefun*dwavefun - wavefun*cdwavefun)
    return j

def deriveOne(wavefun, k):
    wavefun = np.fft.ifft(1j*k*np.fft.fft(wavefun))
    return wavefun

def potentialExpectation(wavefun, potential, dx):

```

```

norm = np.sum(wavefun*np.conj(wavefun)*dx)**0.5
wavefun = wavefun / norm
Vexp = np.sum(wavefun*np.conj(wavefun)*potential*dx)
return Vexp

def initialMomentum(totalEnergy, wavefun, potential, dx, sigma,
L, x0):
    Vexp = np.real(potentialExpectation(wavefun, potential, dx))
    kineticEnergy = totalEnergy - Vexp
    A = np.sum(wavefun*np.conj(wavefun)*dx)
    k0 = Symbol('k0')
    k0 = solve(zFromGauss(k0,L,x0,sigma,kineticEnergy,A),k0)
    return k0

def zFromGauss(k0, L, x0, dx, kineticEnergy, A):
    x0 = x0 * 1e-10
    L = L * 1e-10
    dx = dx * 1e-10
    kineticEnergy = kineticEnergy
    sp = np.sqrt(np.pi)
    Lpart = (L-x0)/dx
    xpart = x0/dx
    erfpart = erf(Lpart) - erf(-xpart)
    expL = np.exp(-Lpart**2)
    expx0 = np.exp(-xpart**2)
    expLL = Lpart*expL
    expxx0 = xpart*expx0
    return -hbark**2/(2*me*A) * (1/(4*dx) * (sp*erfpart - 2*expLL
- 2*expxx0) - 1j*k0*(expx0 - expL) - sp*dx/2*(k0**2 +
1/dx**2)*erfpart) - kineticEnergy
    #return
    (hbark**2/(2*me))* (A**2) * (1/(4*dx**2)) * ((1+2*dx**2*k0**2) *sp*dx*(
erf(x0/dx)+erf((L-x0)/dx)) + 2*np.exp(-
(x0/dx)**2)*(x0+2*1j*k0*dx**2) + 2*np.exp(-((L-x0)/dx)**2)*(L-x0-
2*1j*k0*dx**2))

def cumulativeProb(wavefun, x, xcutoff, dx):
    xAxis = x >= xcutoff
    cutwavefun = wavefun[xAxis]
    cumProb = np.sum(cutwavefun*np.conj(cutwavefun)*dx)
    return cumProb

def closestPeak(target, peakList):
    peakList = np.array(peakList)
    peakDiffs = np.abs(peakList - target)
    return int(peakList[peakDiffs == min(peakDiffs)][0])

import tkinter as tk
import numpy as np
from tkinter import filedialog
from ReadLOCPOT import ReadLOCPOT
import matplotlib.pyplot as plt
import matplotlib.animation as anim
from CPFunct import *
import scipy.signal as sig

root = tk.Tk()
root.withdraw()

```

```

n = 5000
timestep = 0.001 # in fs
flt = 0
cumprob = np.zeros((n,4),dtype=np.cdouble)

#for fl in ['OHH', 'OH', 'O', 'OOH']:
for fl in 4*['O']:
    #FilePath = filedialog.askopenfilename(title="Choose LOCPOT
    File")
    #FilePath = 'D:\OneDrive - Technion\Charge Transfer\LOCPOT-'
+ fl
    FilePath = 'G:\LOCPOT-' + fl
    Potential, ZAxis, KAxis = ReadLOCPOT(FilePath,5,5000,0)
    #Potential, ZAxis = extendPotential(Potential,ZAxis)
    # plt.plot(ZAxis,Potential)

    # electron charge in C
    q = 1.602176634e-19

    z = ZAxis

    inds, props = sig.find_peaks(-Potential,width=10)

    z0 = z[inds[-20]]

    dz = z[1]-z[0]

    # Find middle of z-axis
    zmid = np.floor(len(z)/2)

    # Take the last minimum to be the surface
    zedge = inds[-2]+14

    sigma = 1 # in A

    # From OUTCAR. Ordered OH2, OH, O, OOH
    totalEnergyCond = np.array([2.0804+flt, 1.7528+flt, -
0.1106+flt, 1.5475+flt])*q
    totalEnergyVal = np.array([0.6702+flt, -0.3905+flt, -
0.6051+flt, -0.1430+flt])*q

    k0 = initialMomentum(totalEnergyVal[0], np.exp(-(z-
z0)**2/(2*sigma**2)), Potential*q, \
                        dz*1e-10, sigma, np.max(z), z0)
    k0 = np.abs(float(np.real(complex(k0[0]))/1e10))

    wavefun = np.exp(1j*k0*z)*np.exp(-(z-z0)**2/(2*sigma**2))
    owavefun = wavefun = np.exp(1j*k0*z)*np.exp(-(z-
z0)**2/(2*sigma**2))
    norm = np.linalg.norm(wavefun,ord=2)

    wavefun = wavefun / norm / np.sqrt(dz)

    Vexp = potentialExpectation(wavefun, Potential, dz)

    wavefuncs = np.zeros((n+1,z.size),dtype=np.cdouble)

    timesteps = timestep*np.arange(n)
    probcurs = np.zeros((n+1,z.size),dtype=np.cdouble)
    for i in range(n):
        wavefuncs[i,:] = wavefun

```

```

        probcurs[i,:] = calculateProbabilityCurrent(wavefun,
KAxis)
        cumprob[i,flt] = cumulativeProb(wavefun, z, z[zedge], dz)
        wavefun = RunOneTimestep(wavefun, timestep, Potential,
KAxis)

        headers = ['$*OH_2$', '$*OH$', '$*O$', '$*OOH$']

        flt = flt + 1

# end of outer loop

figt = plt.figure()
pxlabel = 'Time t [fs]'
ylabel = 'Cumulative Probability Beyond Surface'
axist = plt.axes(xlim=(0,n*timestep),ylim=(0,1))
tline = axist.plot(timesteps,cumprob,linewidth=2)
plt.xlabel(pxlabel,fontsize=14)
plt.ylabel(ylabel,fontsize=14)
plt.xticks(fontsize=14)
plt.yticks(fontsize=14)
#axist.legend([r'$*OH_2$',r'$*OH$',r'$*O$',r'$*OOH$'])
axist.legend(["Original Energy","+1 eV","+2 eV","+3
eV"],fontsize=14)

import tkinter as tk
import numpy as np
from tkinter import filedialog
from ReadLOCPOT import ReadLOCPOT
import matplotlib.pyplot as plt
import matplotlib.animation as anim
from CPFunctions import *
import scipy.signal as sig

root = tk.Tk()
root.withdraw()

n = 5000
timestep = 0.001 # in fs
flt = 0
cumprob = np.zeros((n,4),dtype=np.cdouble)

for fl in ['OHH', 'OH', 'O', 'OOH']:
    #FilePath = filedialog.askopenfilename(title="Choose LOCPOT
File")
    #FilePath = 'D:\OneDrive - Technion\Charge Transfer\LOCPOT-'
+ fl
    FilePath = 'G:\LOCPOT-' + fl
    Potential, ZAxis, KAxis = ReadLOCPOT(FilePath,5,5000,0)
    #Potential, ZAxis = extendPotential(Potential,ZAxis)
    # plt.plot(ZAxis,Potential)

    # electron charge in C
    q = 1.602176634e-19

    z = ZAxis

```

```

inds, props = sig.find_peaks(-Potential,width=10)

z0 = z[inds[-20]]

dz = z[1]-z[0]

# Find middle of z-axis
zmid = np.floor(len(z)/2)

# Take the last minimum to be the surface
zedge = inds[-2]+14

sigma = 1 # in A

# From OUTCAR. Ordered OH2, OH, O, OOH
totalEnergyCond = np.array([2.0804, 1.7528, -0.1106,
1.5475])*q
totalEnergyVal = np.array([0.6702, -0.3905, -0.6051, -
0.1430])*q

k0 = initialMomentum(totalEnergyVal[flt], np.exp(-(z-
z0)**2/(2*sigma**2)), Potential*q, \
dz*1e-10, sigma, np.max(z), z0)
k0 = np.abs(float(np.real(complex(k0[0]))/1e10))

wavefun = np.exp(1j*k0*z)*np.exp(-(z-z0)**2/(2*sigma**2))
owavefun = wavefun = np.exp(1j*k0*z)*np.exp(-(z-
z0)**2/(2*sigma**2))
norm = np.linalg.norm(wavefun,ord=2)

wavefun = wavefun / norm / np.sqrt(dz)

Vexp = potentialExpectation(wavefun, Potential, dz)

wavefuncs = np.zeros((n+1,z.size),dtype=np.cdouble)

timesteps = timestep*np.arange(n)
prob curs = np.zeros((n+1,z.size),dtype=np.cdouble)
for i in range(n):
    wavefuncs[i,:] = wavefun
    prob curs[i,:] = calculateProbabilityCurrent(wavefun,
KAxis)
    cumprob[i,flt] = cumulativeProb(wavefun, z, z[zedge], dz)
    wavefun = RunOneTimestep(wavefun, timestep, Potential,
KAxis)

headers = ['$*OH_2$', '$*OH$', '$*O$', '$*OOH$']

flt = flt + 1

# end of outer loop

figt = plt.figure()
pxlabel = 'Time t [fs]'
#ptitle = 'Cumulative Probability Beyond Surface'
axist = plt.axes(xlim=(0,n*timestep),ylim=(0,1))
tline = axist.plot(timesteps,cumprob)
#plt.title(ptitle,fontsize=14)

```

```
plt.xlabel(pxlabel, fontsize=14)
plt.ylabel("Cumulative Probability Beyond Surface", fontsize=14)
plt.yticks(fontsize=14)
plt.xticks(fontsize=14)
axist.legend([r'$*OH_2$', r'$*OH$', r'$*O$', r'$*OOH$'], fontsize=14)
```
